# Supplementary material
Source: Springer Nature journal article supplement (https://www.springermedizin.de/resource/supplementary/12885_2010_2754_MOESM1_ESM.pdf/9461920)

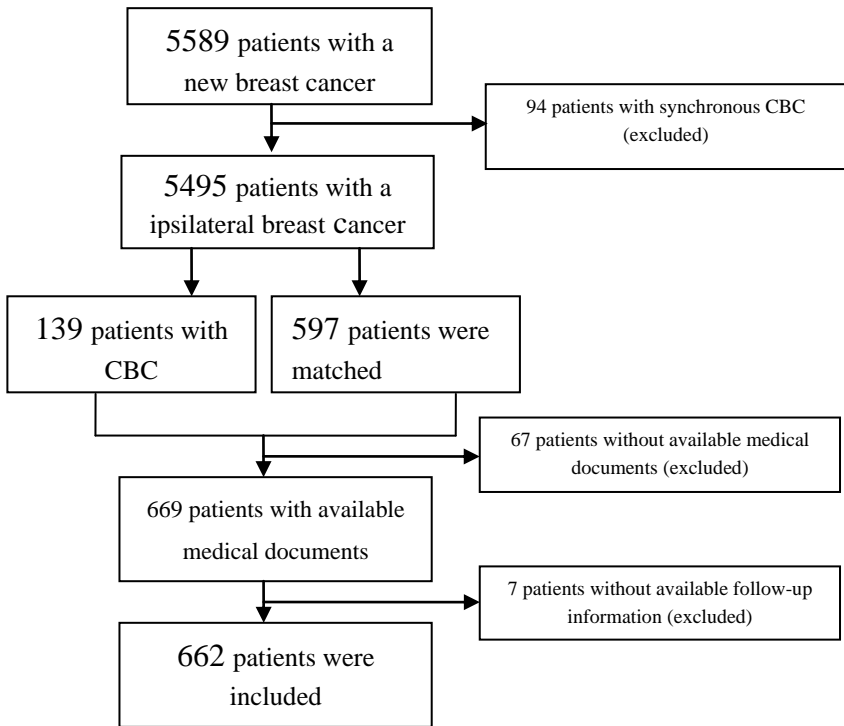

Supplement: MOESM1 [file 9461920]
